# Supplementary material for: Comparative analysis of crop rotation systems: the impact of ginger (Zingiber officinale) and sponge gourd (Luffa aegyptiaca) residues on growth of Chinese cabbage (Brassica rapa var. chinensis)
Source: Front Plant Sci. 2024 Oct 11;15:1428943. doi: 10.3389/fpls.2024.1428943 (PMC11503195; doi:10.3389/fpls.2024.1428943)
Supplement: Supplementary file 1 [file Table1.xlsx]

## Sheet: Supplementary Table 1
Supplementary Table 1. Statistic summary for 16S rRNA sequencing
Sample ID	Raw Reads	Clean Reads	Denoised Reads	Merged Reads	Non-chimeric Reads
G1	79888	75340	74621	70414	64017
G2	79996	75288	75102	73924	71310
G3	80089	75371	74972	73096	69846
G4	79963	74822	74423	71370	65478
G5	79829	74733	74186	71921	68033
S1	80008	75141	74834	73917	71061
S2	79512	74578	74101	72285	67751
S3	80015	75077	74759	73567	70371
S4	80450	76099	75557	73410	69927
S5	80321	74745	74593	73794	71724

## Sheet: Supplementary Table 2
Supplementary Table 2. Statistic summary for ITS sequencing
Sample ID	Raw Reads	Clean Reads	Denoised Reads	Merged Reads	Non-chimeric Reads
G1	80002	46189	46128	45363	45274
G2	79970	23903	23844	23424	23307
G3	79817	31555	31537	31069	30841
G4	80048	35115	35098	34121	33874
G5	79934	41876	41857	41314	41157
S1	79962	31685	31587	30892	30336
S1	80108	52239	52156	49226	48312
S1	79965	42609	42525	36498	35831
S1	80158	32800	32703	30793	30162
S1	80076	35113	35070	34088	33535

## Sheet: Supplementary Table 3
Supplementary Table 3. Alpha diversity of ITS
Sample ID	Feature	ACE	Chao1	Simpson	Shannon	PD_whole_tree	Coverage
G1	307	307.241	307	0.9647	6.1274	77.6419	1
G2	251	251	251	0.9851	6.9641	61.5506	1
G3	269	269	269	0.9786	6.9653	69.5299	1
G4	301	301.309	301	0.962	6.223	73.1794	1
G5	260	260.264	260	0.9355	5.8948	66.6652	1
S1	265	265.543	265	0.9868	7.2791	59.2208	1
S2	247	248.254	247.5	0.9587	6.3345	65.5666	0.9999
S3	251	251	251	0.9881	7.1958	72.5794	1
S4	247	247.21	247	0.9787	6.8888	65.0508	1
S5	281	281	281	0.9836	7.1484	64.3822	1

## Sheet: Supplementary Table 4
Supplementary Table 4. Alpha diversity of 16S
Sample ID	Feature	ACE	Chao1	Simpson	Shannon	PD_whole_tree	Coverage
G1	2827	2834.45	2828.05	0.9848	9.5271	156.266	0.9996
G2	1168	1176.01	1170.37	0.8382	5.0032	94.7636	0.9996
G3	1433	1440.98	1434.66	0.8395	5.38	96.7799	0.9996
G4	1775	1784.81	1776.88	0.9343	6.6696	120.244	0.9995
G5	2487	2493.84	2488.19	0.9748	8.6374	138.417	0.9996
S1	1339	1343.04	1339.77	0.8785	6.2875	99.6591	0.9998
S2	1759	1763.73	1759.86	0.9903	8.5153	110.865	0.9997
S3	1331	1336.84	1332.09	0.9839	7.6095	127.898	0.9997
S4	2006	2010.64	2006.61	0.949	7.9009	134.845	0.9998
S5	1061	1066.84	1062.69	0.8303	5.3182	78.2564	0.9997

## Sheet: Supplementary Table 5
Supplementary Table 5. 16S OUT number
Sample	OTU_Num	Seqs_Num
G1	2827	63405
G2	1168	71131
G3	1433	69569
G4	1775	64998
G5	2487	67698
S1	1339	70905
S2	1759	67478
S3	1331	70153
S4	2006	69635
S5	1061	71584

## Sheet: Supplementary Table 6
Supplementary Table 6. ITS OUT number
Sample	OTU_Num	Seqs_Num
cap1	307	45261
cap2	251	23297
cap3	269	30830
cap4	301	33858
cap5	260	41144
sol1	265	30320
sol2	247	48300
sol3	251	35825
sol4	247	30157
sol5	281	33528
Total	2158	352520

## Sheet: Supplementary Table 7
Supplementary Table 7. RDA for 16S rRNA dataset and soil physicochemical parameters
axis	spe	predictor	correlation	p
1	Purpureocillium_lilacinum	TN	0.843229	0.00217724
1	Xenomyrothecium_tongaense	SOC	0.973557	2.07184133072819e-06
1	Acremonium_dichromosporum	SOC	0.674923	0.0322597
1	Podospora_bulbillosa	SOC	0.648489	0.0425385
1	unclassified_Chaetomiaceae	AK	0.887881	0.000602597
1	unclassified_Agaricomycetes	TN	0.766812	0.00965616
1	Moesziomyces_antarcticus	SOC	0.787204	0.00687704
1	Moesziomyces_aphidis	AK	0.684414	0.0290252
1	unclassified_Ustilago	SOC	0.837896	0.00247212
1	unclassified_Basidiomycota	TN	0.787607	0.00682864
2	Curvularia_pisi	SOC	0.405033	0.245593
2	unclassified_Penicillium	TN	0.753889	0.0117797
2	Metacordyceps_chlamydosporia	TN	0.651075	0.0414473
2	unclassified_Sordariales	SOC	0.482434	0.157896
2	Coprinopsis_afrocinerea	AP	0.503402	0.137995
2	unidentified	TN	0.433773	0.210408
3	Didymella_keratinophila	TN	0.396521	0.256605
3	unclassified_Didymellaceae	AK	0.392733	0.261591
3	Saccharomyces_cerevisiae	AK	0.688739	0.0276277
3	Plectosphaerella_niemeijerarum	AK	0.778326	0.00800542
3	Albifimbria_verrucaria	AP	0.856975	0.00153485
3	unclassified_unidentified	AP	0.3132	0.378218
3	Mortierella_wolfii	SOC	0.359478	0.307622

## Sheet: Supplementary Table 8
Supplementary Table 8. RDA for ITS dataset and soil physicochemical parameters
axis	spe	predictor	correlation	p
1	Amycolatopsis_xylanica	TN	0.653283	0.0405305
1	unclassified_Amycolatopsis	SOC	0.848255	0.00192345
1	unclassified_Lechevalieria	pH	0.635487	0.0483169
1	unclassified_Streptomyces	TN	0.695834	0.0254361
1	unclassified_Chitinophaga	TN	0.813088	0.00423291
1	unclassified_Niastella	SOC	0.7451	0.0133982
1	unclassified_Cyanobacteriales	TN	0.263594	0.461809
1	unclassified_Gemmatimonas	TN	0.738763	0.0146577
1	unclassified_Gemmatimonadaceae	AP	0.592084	0.0713288
1	unclassified_Caulobacter	AK	0.572108	0.0839606
1	unclassified_Dongia	TN	0.663466	0.0364798
1	unclassified_Ensifer	SOC	0.781889	0.00753791
1	unclassified_Rhizobiaceae	AK	0.88398	0.000687582
1	unclassified_Sphingopyxis	TN	0.726574	0.0173084
1	Mitsuaria_chitosanitabida	AK	0.55265	0.0975669
1	unclassified_Pelomonas	TN	0.771563	0.00894851
1	unclassified_Variovorax	SOC	0.80659	0.00481248
1	Rivibacter_sp.	SOC	0.788917	0.00667307
1	unclassified_Comamonadaceae	AK	0.737035	0.015015
1	unclassified_Oxalobacteraceae	SOC	0.651622	0.0412189
1	unclassified_Pseudomonas	SOC	0.676222	0.031803
1	Pseudoxanthomonas_helianthi	TN	0.873412	0.000961604
1	unclassified_Bacteria	AP	0.462963	0.177841
2	unclassified_Nocardioides	SOC	0.285633	0.423707
2	unclassified_Novosphingobium	AP	0.676187	0.0318152
3	unclassified_Candidatus_Solibacter	AP	0.619601	0.0560588
3	unclassified_RB41	pH	0.277249	0.438026
3	unclassified_Vicinamibacteraceae	pH	0.478314	0.161998
3	unclassified_Vicinamibacterales	SOC	0.478783	0.161528
3	unclassified_Dyadobacter	pH	0.222603	0.536476
3	unclassified_Chryseobacterium	AP	0.717919	0.0193811
3	uncultured_soil_bacterium	SOC	0.478783	0.161528
3	unclassified_Chloroflexi	pH	0.587766	0.0739469
3	unclassified_Leptolyngbya_EcFYyyy_00	pH	0.889993	0.000559946
3	unclassified_Bacillus	pH	0.747683	0.0129074
3	uncultured_Firmicutes_bacterium	AP	0.822778	0.00346393
3	unclassified_Nitrospira	AP	0.369147	0.293824
3	uncultured_Nitrospiraceae_bacterium	AP	0.488563	0.15191
3	unclassified_Elsterales	AK	0.616117	0.0578599
3	unclassified_Allorhizobium_Neorhizobium_Pararhizobium_Rhizobium	pH	0.559798	0.0924166
3	unclassified_MND1	AP	0.488712	0.151767
